# Supplementary material for: Detecting the movement and spawning activity of bigheaded carps with environmental DNA
Source: PubMed Central journal article supplement (PMC6680351; doi:10.1111/1755-0998.12533), 2016-05-09
Supplement: MEN-16-957-s001.pdf [file MEN-16-957-s001.pdf]

**Detecting the movement and spawning activity of bigheaded carps with environmental DNA**

**Richard A. Erickson<sup>1\*</sup>¶, Christopher B. Rees<sup>1¶§</sup>, Alison A. Coulter<sup>2¶†</sup>, Christopher M.**

**Merkes<sup>1</sup>, S. Grace McCalla<sup>1¶</sup>, Katherine F. Touzinsky<sup>2</sup>, Liza Walleser<sup>1#</sup>, Reuben R.**

**Goforth<sup>2&</sup>, Jon J. Amberg<sup>1&</sup>**

Supplemental materials

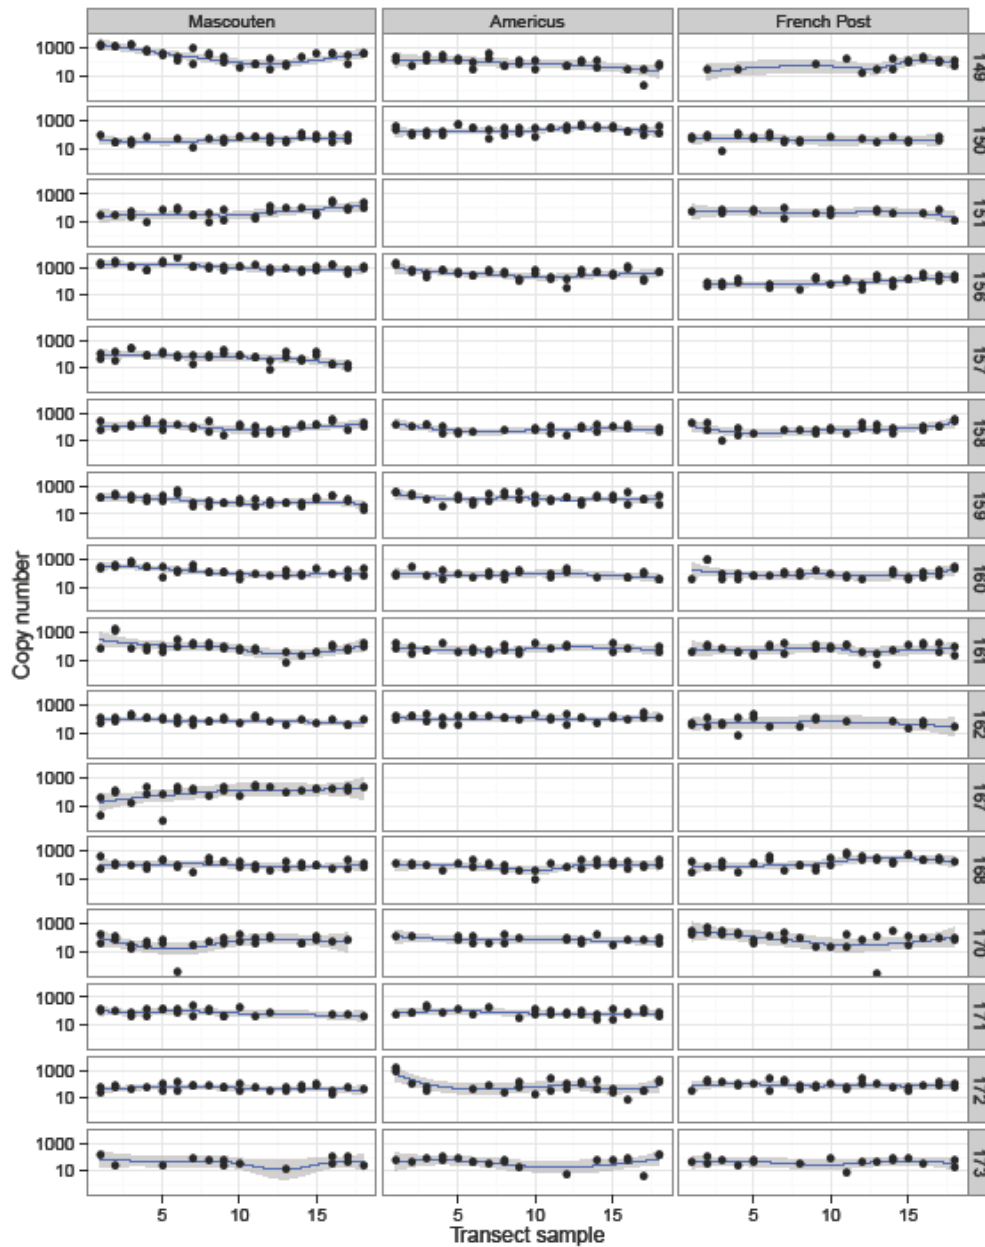

Supplemental Figure 1: Observed copy numbers along sampling transects. The blue line is a spline fitting to the data to help visualize any trends across transects. The figure is faceted by site on the x axis and sample day on the y-axis.

eDNA measurements of spawning and movement

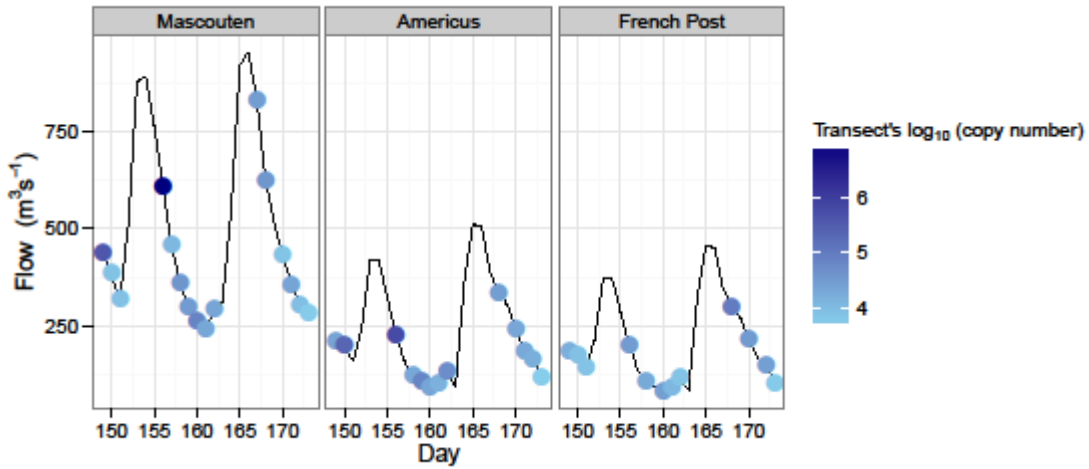

Supplemental Figure 2: Observed copy numbers and flow through time at the three study sites.

The dots are shaded based upon copy number at each transect.

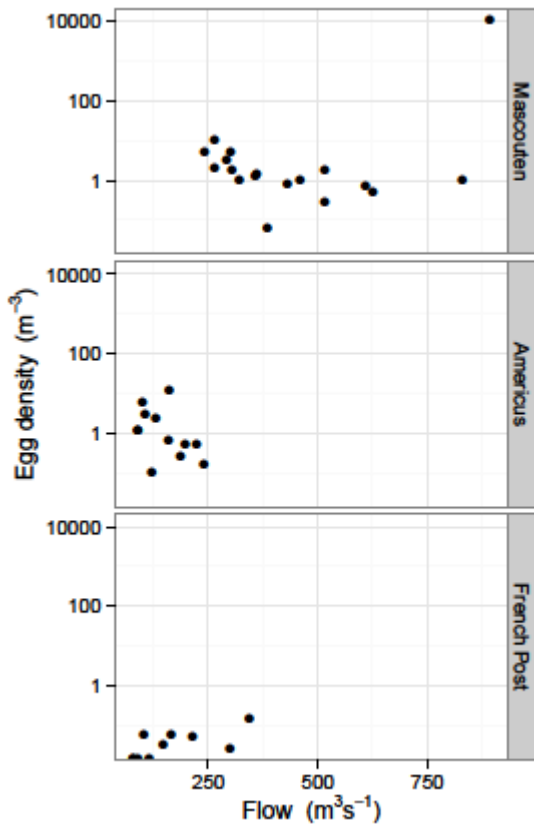

Supplemental Figure 3: Flow versus egg density for all three sites.

eDNA measurements of spawning and movement

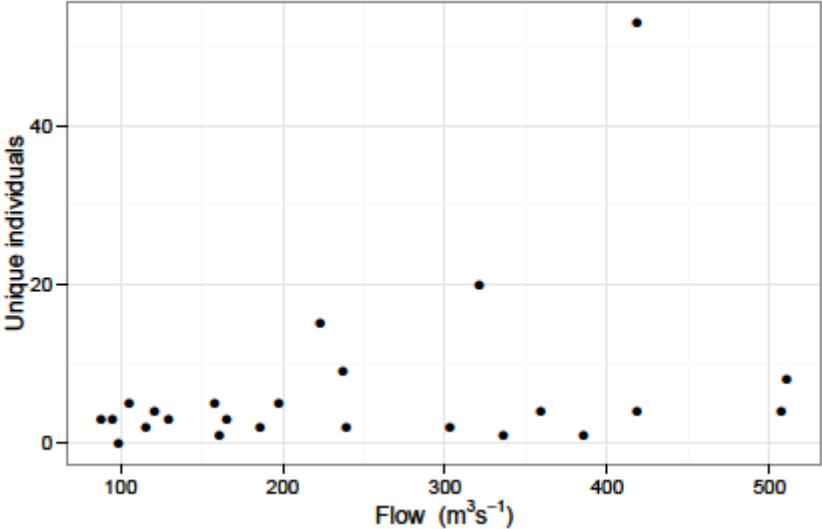

Supplemental Figure 4: Relationship between flow and the count of unique carp passing the Americus study site each day.

eDNA measurements of spawning and movement

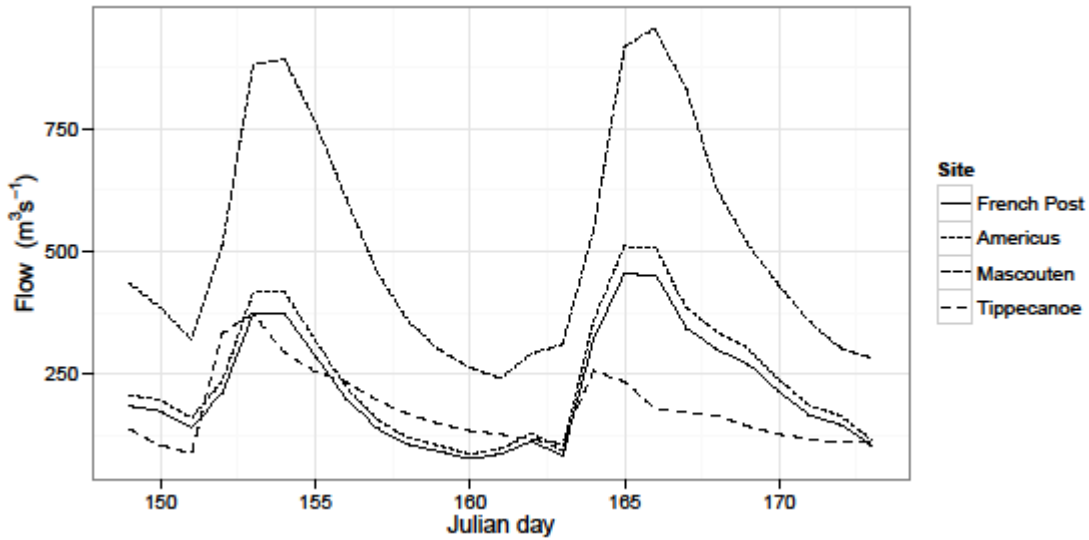

Supplemental Figure 5: Wabash River discharge data for 2013 at the three transect locations (French Post, Americus, and Mascouten) and one major tributary (Tippecanoe’s confluence, which is located immediately downriver from Americus). Discharge rates at Mascouten were from the U.S. Geological Survey Surface-Water Data for the Nation database (U.S. Geological Survey) for the Wabash River at Lafayette, IN (site number 03335500). Discharge rates for Americus and French Post were calculated by the USGS Illinois Water Sciences Center using the drainage area ratio method with data obtained from the U.S. Geological Survey stream gage at Logansport, IN (site number 03329000).

## eDNA measurements of spawning and movement

Supplemental Table 1: Posterior distributions for regression parameters from the multilevel model used to examine the relationship between eDNA copy number and telemetry

|               | 2.5%       | 10%       | 50%       | 90%       | 97.5%     |
|---------------|------------|-----------|-----------|-----------|-----------|
| sigmaPoint    | 0.5461674  | 0.5563709 | 0.5812875 | 0.6050475 | 0.6172601 |
| sigmaTransect | 0.4565160  | 0.4783862 | 0.5164018 | 0.5508169 | 0.5703470 |
| sigmaTel      | 3.2159583  | 3.4748347 | 3.8931717 | 4.4943849 | 4.8455869 |
| tel0          | 1.2857339  | 1.7847703 | 3.0759970 | 4.3142257 | 4.7489119 |
| tel1          | -0.4024899 | 0.0884802 | 0.9651263 | 2.0660596 | 2.5222389 |
